# Supplementary material for: Type I IFN Induces IL-10 Production in an IL-27–Independent Manner and Blocks Responsiveness to IFN-γ for Production of IL-12 and Bacterial Killing in Mycobacterium tuberculosis–Infected Macrophages
Source: PubMed Central journal article supplement (PMC4170673; doi:10.4049/jimmunol.1401088), 2014-09-03
Supplement: 1401088_JI_1401088_Supplemental_Figures_1.pdf [file 1401088_JI_1401088_Supplemental_Figures_1.pdf]

Supplementary Figure 1

A

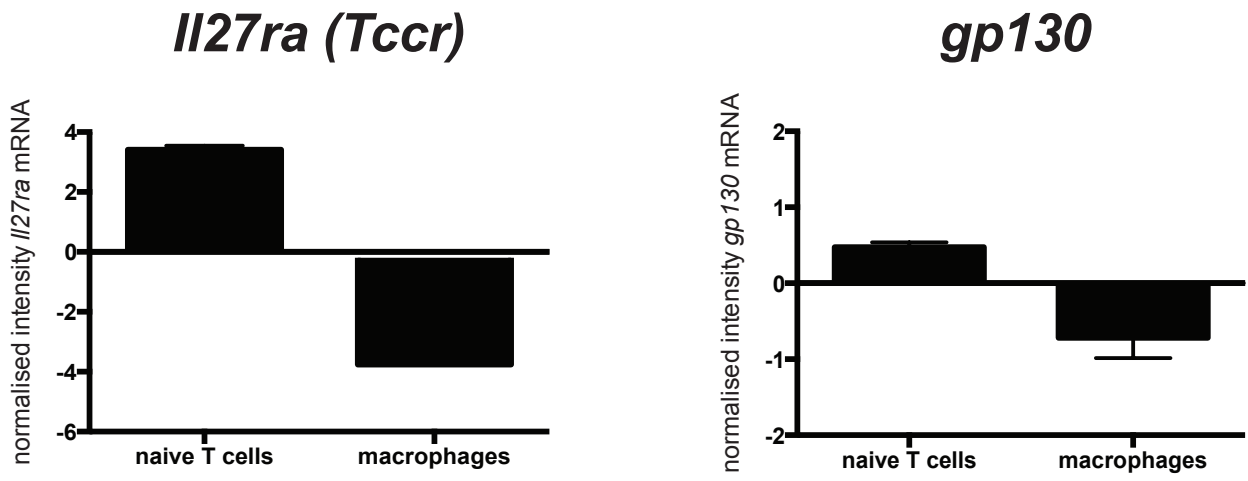

B

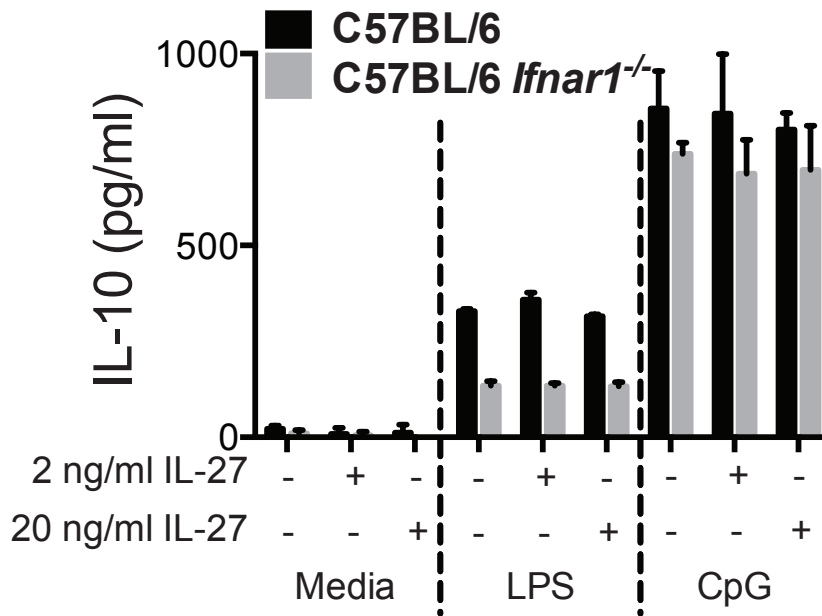

**Supplementary Figure 1. Macrophage IL-27 receptor subunit mRNA expression relative to naïve T cells and IL-10 production in response to recombinant IL-27 treatment upon LPS or CpG treatment.**

(A) mRNA levels of the IL-27 receptor subunits IL-27ra and gp130 in resting bone marrow-derived macrophages and naïve T cells were filtered by detection from background and levels normalised to the median of all samples. (B) WT and IFNAR<sup>-/-</sup> macrophages were stimulated with 10ng/ml LPS or 0.5  $\mu$ M CpG and treated at the same time with recombinant IL-27 at the indicated doses. IL-10 levels in the supernatant were then measured by ELISA at 24 hours post-stimulation. Graphs show mean  $\pm$  SEM. Data is representative of four independent experiments.

# Supplementary Figure 2

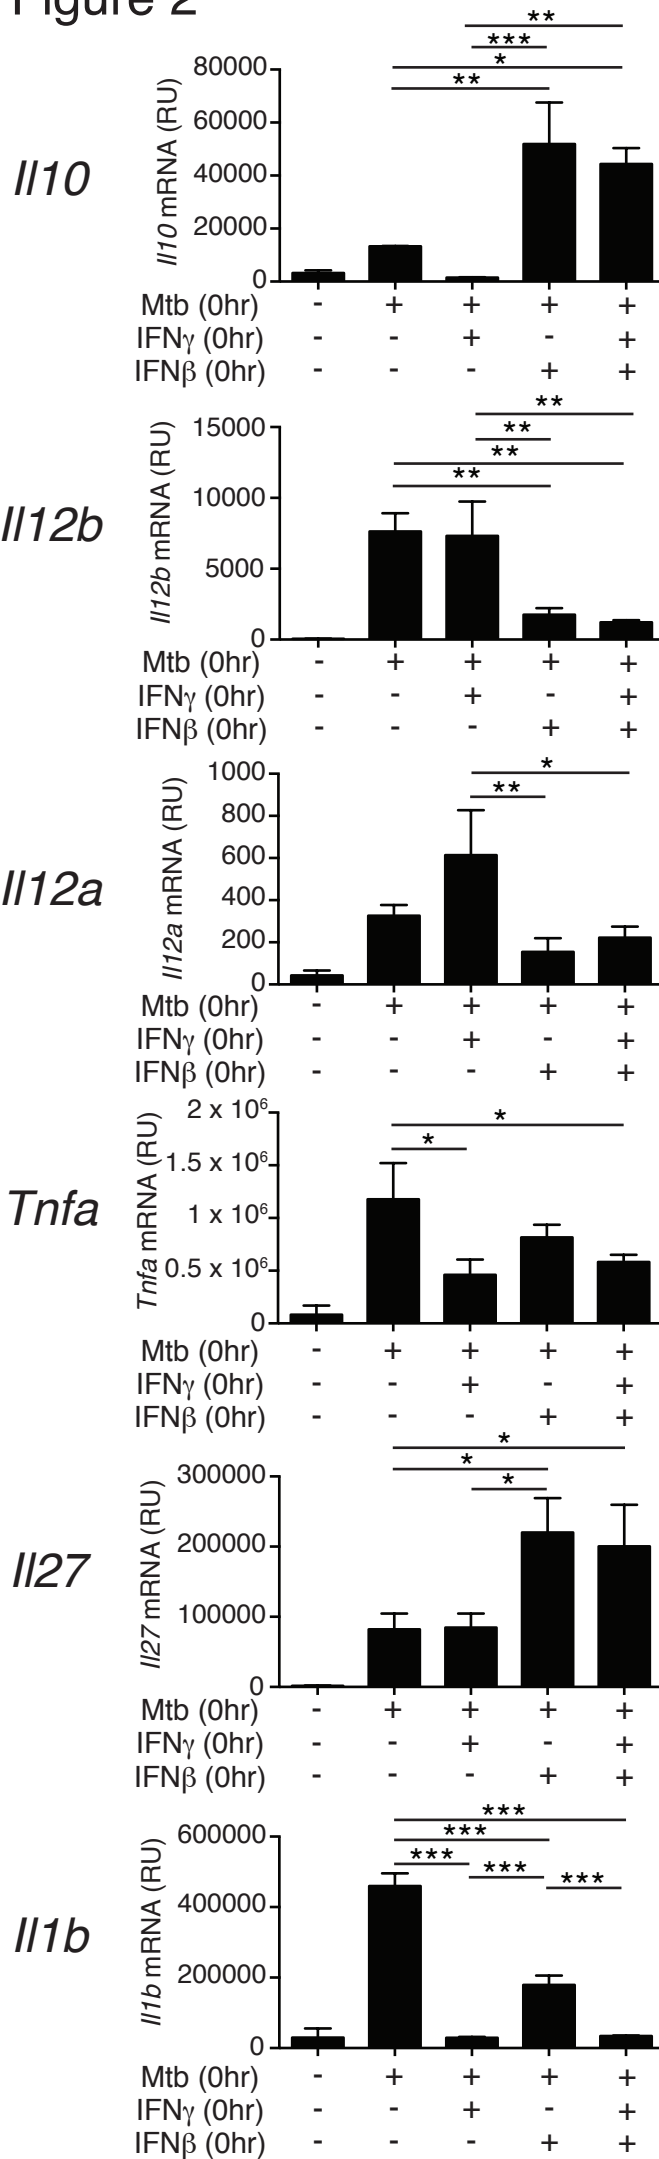

**Supplementary Figure 2. Exogenous IFN $\beta$  inhibits *Mtb* infected macrophage responsiveness to concomitant IFN $\gamma$  addition.**

WT macrophages were infected with *Mtb* alone or with *Mtb* and IFN $\beta$  (2 ng/ml), *Mtb* and IFN $\gamma$  (5 ng/ml) or *Mtb* and both IFN $\beta$  (2 ng/ml) and IFN $\gamma$  (5 ng/ml) together, added at the time of infection. Cytokine mRNA levels were then measured by qRT-PCR at 6 h post-infection. Graphs show mean  $\pm$  SEM. Significance was determined using 1-way ANOVA with Bonferroni post-hoc test. Data is representative of three independent experiments.
